# Supplementary material for: A novel coumarin derivative-modified cellulose fluorescent probe for selective and sensitive detection of CN− in food samples
Source: Royal Society of Chemistry journal article supplement (doi:10.1039/d2ay01886a), 2023-01-01
Supplement: d2ay01886a1.pdf [file d2ay01886a1.pdf]

## Supplementary Material

### **A novel coumarin derivatives-modified cellulose fluorescent probe for selective and sensitive detection of CN<sup>-</sup> in food sample**

Jiali Kou, Zhiyuan Meng, Xiaoyuan Wang, Zhonglong Wang\*, Yiqin Yang\*

*Co-Innovation Center of Efficient Processing and Utilization of Forest Resources,  
International Innovation Center for Forest Chemicals and Materials, College of Light  
Industry and Food, College of Chemical Engineering, Nanjing Forestry University,  
Nanjing, 210037, China*

\*Corresponding author: Dr. Zhonglong Wang

Phone: +86-25-85428369, Fax: +86-25-85428369

Email: wang\_zhonglong@njfu.edu.cn

\*Corresponding author: Dr. and Prof. Yiqin Yang

Phone: +86-25-85427118, Fax: +86-25-85427118

Email: wsfyyq@njfu.edu.cn

## 1. Experimental instruments

Fourier transform-infrared (FT-IR) spectra were recorded on Nicolet spectrometer using powder-pressed KBr. UV-*vis* absorption spectra were obtained on Shimadzu UV-2450 spectrophotometer, and fluorescence spectra were acquired on PerkinElmer LS55 spectrophotometer. <sup>1</sup>H NMR spectra were gained on Bruker AV 600 spectrometer in DMSO-*d*<sub>6</sub>, and ESI-MS spectra were measured on LTQ Orbitrap XL mass spectrometer. XPS spectra data were obtained on Shimadzu AXIS UltraDLD X-ray photoelectron spectrometer with monochromatic Al Kα radiation ( $h\nu = 1486.6$  eV, 600 W). The element compositions of chemicals were measured on PE2400II organic elemental analyzer (EA). The microscopic morphologies of samples were obtained using Quanta 200 scanning electron microscope (SEM). X-ray diffraction (XRD) patterns were determined with Rigaku Ultima IV horizontal X-ray diffractometer. Thermogravimetric data were collected on Netzsch TGA-209 F1 thermogravimetric analyzer at a heating rate of 20 °C/min under nitrogen atmosphere over a range of 25-800 °C.

## 2. Figures

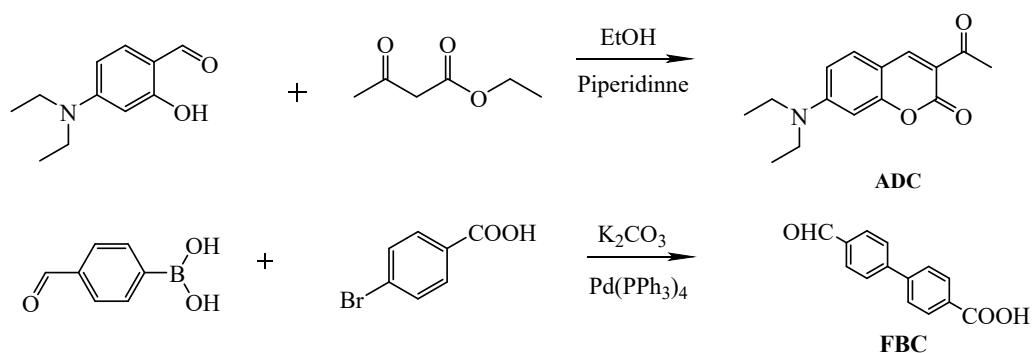

**Scheme S1.** The synthesis route of **ADC** and **FBC**.

**Fig. S1.** <sup>1</sup>H NMR spectra of compound **ADC**.

**Fig. S2.** <sup>1</sup>H NMR spectra of compound **FBC**.

**Fig. S3.** Fluorescence emission intensity of **ADC** and **DCB** excited at 365 nm.

**Fig. S4.** photostability of **DCB-CA** ( $1 \times 10^{-4}$  g/mL) and **DCB-CA** + CN<sup>-</sup> ( $1 \times 10^{-4}$  g/mL +100.0 μM CN<sup>-</sup>) were measured in DMF solution.

**Fig. S5.** The HRMS spectra of **DCB**

**Fig. S6.** The HRMS spectra of **DCB** after reaction with CN<sup>-</sup>.

**Fig. S7.** Stress-strain curve of **DCB-CA** film.

**Fig. S8.** The relationship between the absorption intensity at 450 nm and immersion time of **DCB-CA** film in water.

**Fig. S9.** Photographs of the film being placed in the water for 48 h under day light (a) and 365 nm UV lamp (b).



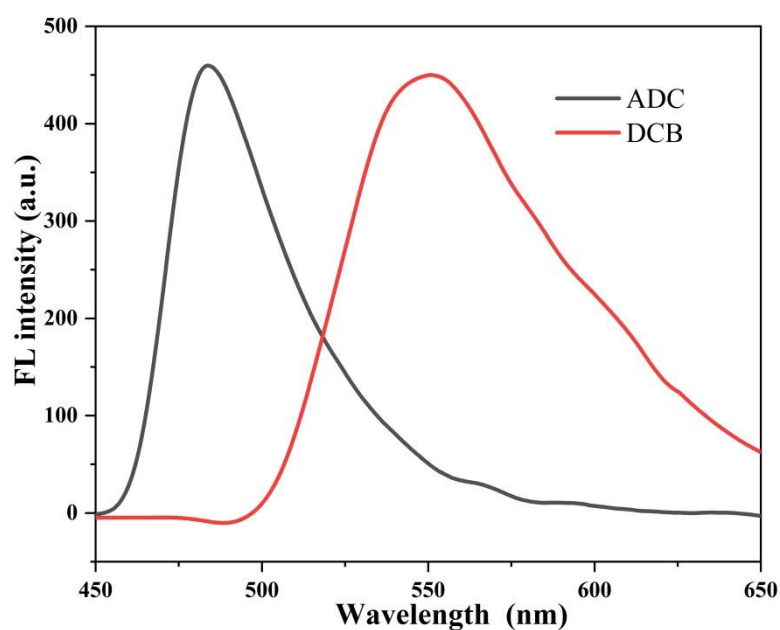

Fig. S3 Fluorescence emission intensity of **ADC** and **DCB** excited at 365 nm.

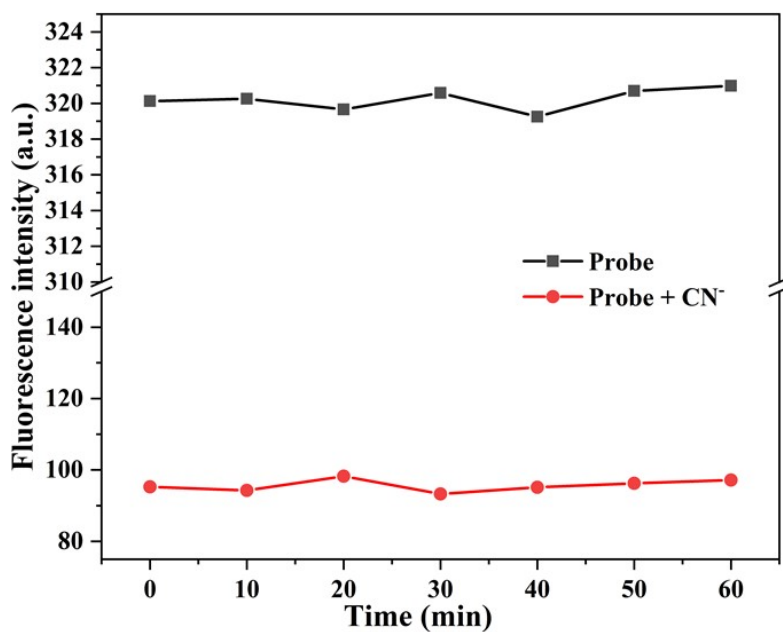

Fig. S4 photostability of **DCB-CA** ( $1 \times 10^{-4}$  g/mL) and **DCB-CA** +  $\text{CN}^-$  ( $1 \times 10^{-4}$  g/mL +  $100.0 \mu\text{M CN}^-$ ) were measured in DMF solution.

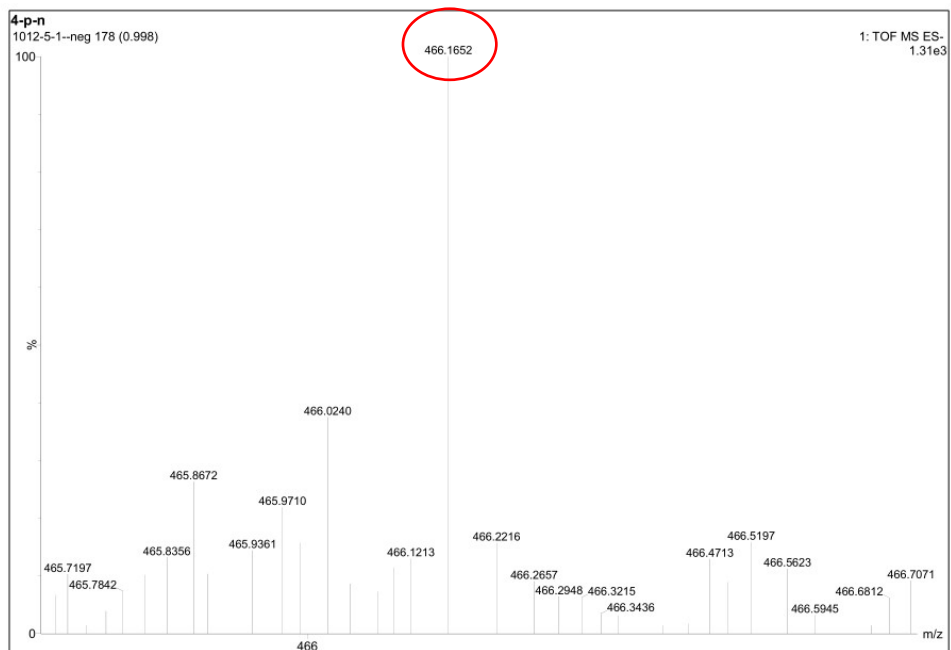

Fig. S5 The HRMS spectra of DCB

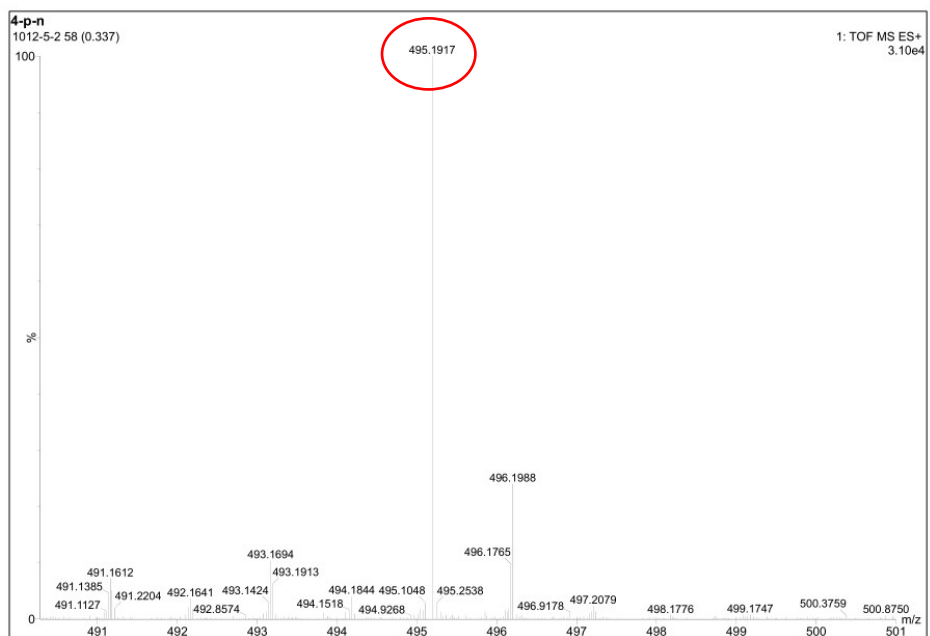

Fig. S6 The HRMS spectra of DCB-CN.

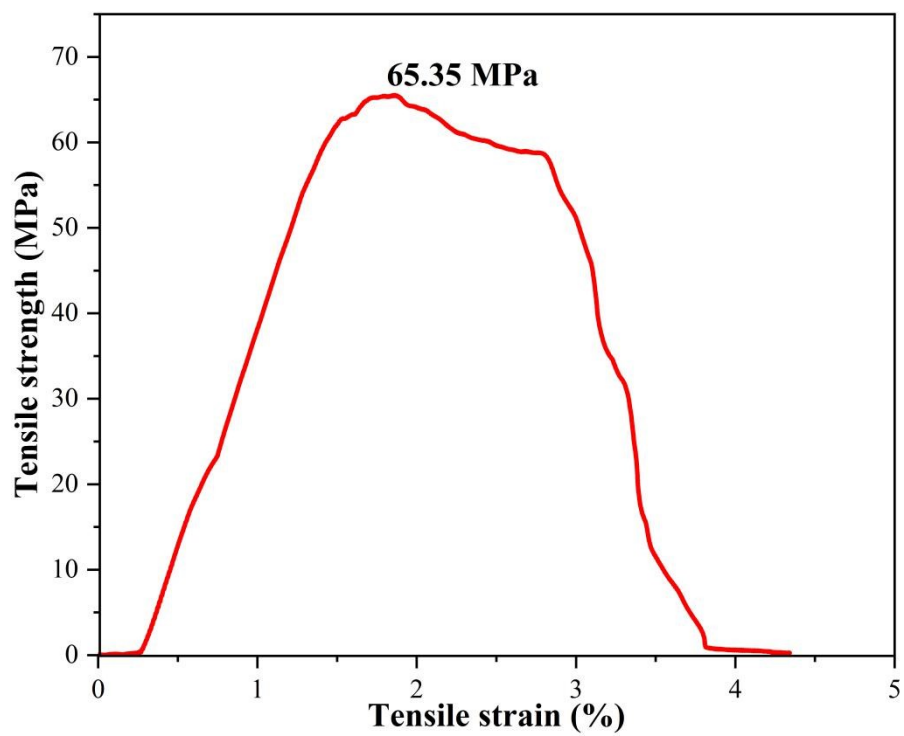

**Fig. S7** Stress-strain curve of DCB-CA film.

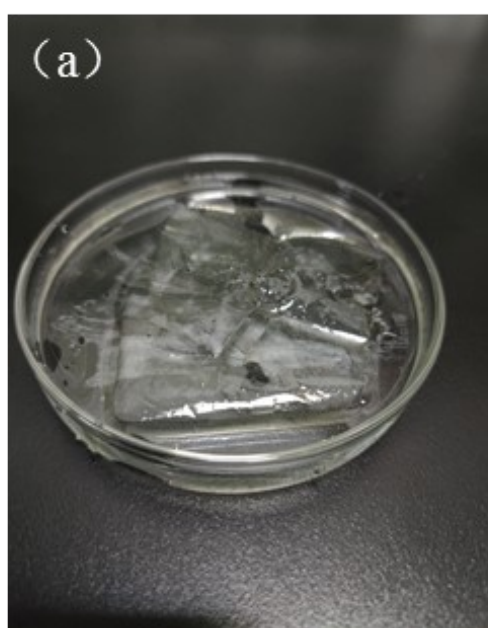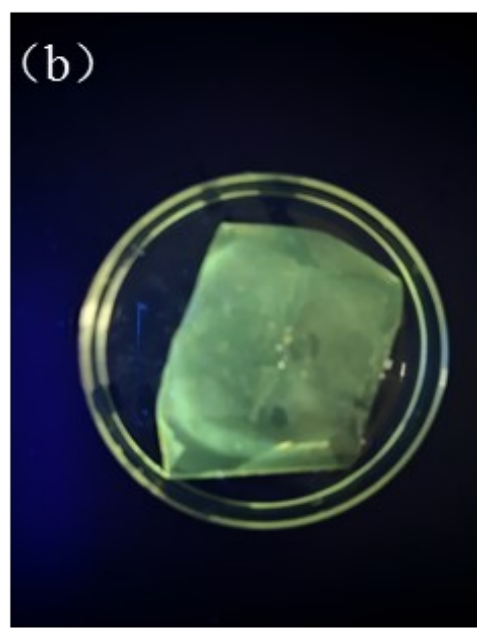

**Fig. S8** Photographs of the film being placed in the water for 48 h under day light (a) and 365 nm UV lamp (b).

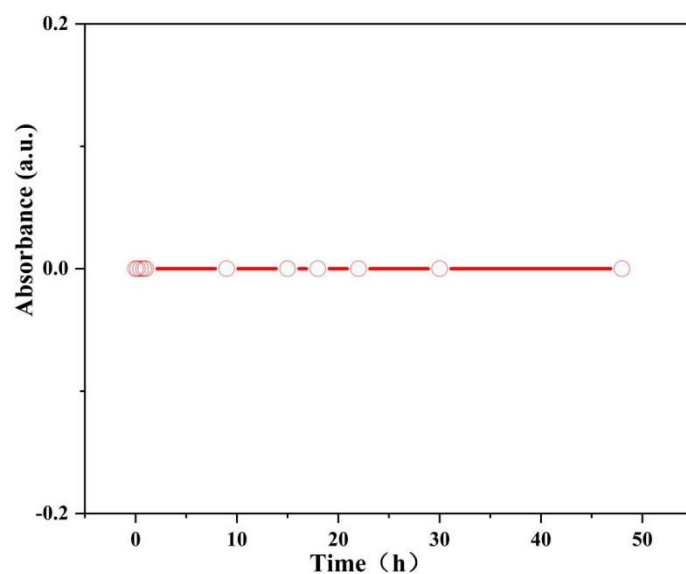

**Fig. S9** The relationship between the absorption intensity at 450 nm and immersion time of **DCB-CA** film in water.

**Table S1** Comparison of **DCB-CA** with other  $\text{CN}^-$  probes.

| Sensors | Structure of probe                                                                  | Methods     | LOD ( $\mu\text{M}$ ) | Food samples application | Materials | References |
|---------|-------------------------------------------------------------------------------------|-------------|-----------------------|--------------------------|-----------|------------|
| R       | 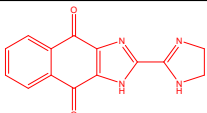 | Fluorometry | 1                     | No                       | Strips    | 1          |



|                  |                                                                                     |              |      |     |        |           |
|------------------|-------------------------------------------------------------------------------------|--------------|------|-----|--------|-----------|
| P1               | 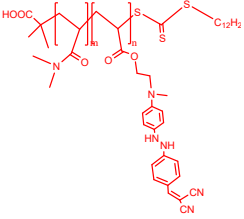   | Fluorometry  | 8    | Yes | Strips | 2         |
| L1               |    | Fluorometry  | 0.95 | Yes | Strips | 3         |
| DSS              |    | Colorimetric | 5.81 | No  | No     | 4         |
| AIN              |    | Colorimetric | 12.3 | No  | No     | 5         |
| NBF              |    | Fluorometry  | 2.23 | Yes | No     | 6         |
| ML'CT+L'<br>L'CT |  | Colorimetric | 6.0  | No  | No     | 7         |
| DCB-CA           |  | Fluorometry  | 0.58 | Yes | Film   | This work |

---

## References

1. P. R. Lakshmi, P. Jayasudha, K. P. Elango, *Spectrochim. Acta. A Mol. Biomol. Spectrosc.*, 2019, **213**, 318–323.
2. R. Sharma, H. Lee, *New J. Chem.*, 2022, **46**, 15244–15252.
3. P. Pei, J. Hu, Y. Chen, Y. Sun, J. Qi, *Spectrochim. Acta. A Mol. Biomol. Spectrosc.*, 2017, **181**, 131–136.
4. L. Wan, Q. Shu, J. Zhu, S. Jin, N. Li, X. Chen, S. Chen, *Talanta*, 2016, **152**, 39–44.
5. J. M. Jung, D. Yun, H. Lee, K. T. Kim, *Sensors and Actuators B: Chemical*, 2019, **297**, 126814.
6. Y. Gao, M. Li, X. Tian, K. Xu, S. Gong, Y. Zhang, Y. Yang, Z. Wang and S. Wang, *Spectrochimica Acta Part A: Molecular and Biomolecular Spectroscopy*, 2022, **271**, 120882.
7. J. L. Fillaut, H. Akdas-Kilig, E. Dean, C. Latouche, A. Boucekkine, *Inorganic Chemistry*, 2013, **52**, 4890–4897.
